# Supplementary material
Source: publisher figshare collection journal article supplement (https://gsajournals.figshare.com/ndownloader/files/25453571)
Supplement: Supplementary file 1 [file 25453571]

## Sheet: Fig. 2B
Figure 2B
Samples with fewer than 25 embryos were removed from analysis. Rationale described in methods. 0hr count and 30 hr count as the number of unhatched embryos. Replicate 1 and replicate 2 are seperated by a single empty row.
19HR23	19HR04
	Mother	Father			Mother	Father			Mother	Father			Mother	Father			Mother	Father			Mother	Father			Mother	Father			Mother	Father			Mother	Father			Mother	Father			Mother	Father			Mother	Father			Mother
	nos:VP16[-];ywT3[-]	nos:VP16[-];wMel cifA;cifB[-]			nos:VP16[-];ywT3[-]	nos:VP16[-];wRec cifA[-]			nos:VP16[-];ywT3[-]	nos:VP16[-];wRec cifB[-]			nos:VP16[-];ywT3[-]	nos:VP16[-];wRec cifA;cifB[-]			nos:VP16[-];wRec cifA[-]	nos:VP16[-];wMel cifA;cifB[-]			nos:VP16[-];wRec cifA[-]	nos:VP16[-];wRec cifB[-]			nos:VP16[-];wRec cifA[-]	nos:VP16[-];wRec cifA;cifB[-]			nos:VP16[-];wRec cifA; cifB[-]	nos:VP16[-];wMel cifA;cifB[-]			nos:VP16[-];wRec cifA; cifB[-]	nos:VP16[-];wRec cifB[-]			nos:VP16[-];wRec cifA; cifB[-]	nos:VP16[-];wRec cifA;cifB[-]			nos:VP16[-];wMel cifA[-]	nos:VP16[-];wMel cifA;cifB[-]			nos:VP16[-];wMel cifA[-]	nos:VP16[-];wRec cifB[-]			nos:VP16[-];wMel cifA[-]
	0 Hr Count	30 Hr Count	% Hatching		0 Hr Count	30 Hr Count	% Hatching		0 Hr Count	30 Hr Count	% Hatching		0 Hr Count	30 Hr Count	% Hatching		0 Hr Count	30 Hr Count	% Hatching		0 Hr Count	30 Hr Count	% Hatching		0 Hr Count	30 Hr Count	% Hatching		0 Hr Count	30 Hr Count	% Hatching		0 Hr Count	30 Hr Count	% Hatching		0 Hr Count	30 Hr Count	% Hatching		0 Hr Count	30 Hr Count	% Hatching		0 Hr Count	30 Hr Count	% Hatching		0 Hr Count
	92	91	1.08696		61	6	90.1639		63	63	0		101	43	57.4257		110	0	100		49	49	0		90	6	93.3333		95	2	97.8947		40	40	0		97	5	94.8454		92	5	94.5652		68	68	0		107
	89	87	2.24719		60	4	93.3333		48	48	0		92	10	89.1304		99	1	98.9899		31	31	0		89	1	98.8764		89	6	93.2584		29	29	0		80	3	96.25		91	1	98.9011		64	64	0		97
	87	86	1.14943		55	5	90.9091		32	32	0		91	8	91.2088		81	1	98.7654		28	28	0		88	0	100		89	3	96.6292		10	10	0		72	3	95.8333		91	2	97.8022		16	16	0		88
	83	81	2.40964		47	5	89.3617		28	28	0		79	17	78.481		76	0	100		13	13	0		64	2	96.875		83	13	84.3373		6	6	0		70	32	54.2857		90	0	100		13	13	0		87
	83	83	0		46	3	93.4783		27	27	0		74	7	90.5405		70	8	88.5714		7	6	14.2857		62	0	100		81	4	95.0617						69	3	95.6522		81	4	95.0617		7	7	0		85
	83	83	0		46	10	78.2609		26	26	0		73	8	89.0411		67	24	64.1791		6	6	0		59	0	100		70	0	100		84	84	0		64	6	90.625		78	0	100		1	1	0		81
	78	78	0		45	5	88.8889		25	25	0		70	22	68.5714		66	0	100		4	4	0		58	0	100		68	5	92.6471		63	63	0		63	8	87.3016		76	0	100		0	0			79
	78	78	0		45	15	66.6667		19	19	0		66	19	71.2121		59	2	96.6102		0	0			56	2	96.4286		62	23	62.9032		62	62	0		60	3	95		65	3	95.3846		0	0			77
	77	77	0		44	6	86.3636		16	16	0		63	18	71.4286		59	0	100						54	0	100		57	3	94.7368		51	51	0		57	15	73.6842		64	4	93.75		0	0			75
	71	71	0		43	2	95.3488		16	16	0		63	23	63.4921		58	1	98.2759		57	57	0		52	1	98.0769		45	1	97.7778		48	48	0		39	2	94.8718		63	1	98.4127						73
	61	56	8.19672		41	7	82.9268		15	15	0		62	58	6.45161		57	1	98.2456		41	41	0		51	1	98.0392		33	11	66.6667		47	47	0		30	2	93.3333		62	1	98.3871		91	91	0		69
	57	56	1.75439		32	3	90.625		15	15	0		55	25	54.5455		56	1	98.2143		39	39	0		45	9	80		29	10	65.5172		44	44	0		11	11	0		61	5	91.8033		58	58	0		53
	57	56	1.75439		30	2	93.3333		13	13	0		54	21	61.1111		47	1	97.8723		39	39	0		40	1	97.5		12	12	0		35	35	0		0	0			58	1	98.2759		56	56	0		27
	57	57	0		16	6	62.5		8	8	0		51	11	78.4314		40	1	97.5		34	34	0		38	0	100		10	7	30		29	29	0		0	0			5	5	0		53	52	1.88679		7
	54	51	5.55556		15	3	80		7	7	0		48	8	83.3333		22	22	0		31	31	0		6	6	0		0	0			25	25	0		0	0			0	0			50	50	0		0
	39	39	0		2	2	0		0	0			44	13	70.4545		1	1	0		29	29	0		3	1	66.6667		0	0			24	24	0		0	0			0	0			50	50	0		0
	38	38	0										43	10	76.7442						26	26	0										22	22	0										49	49	0
	38	37	2.63158		115	6	94.7826		120	120	0		35	11	68.5714		82	3	96.3415		26	26	0		85	4	95.2941		129	11	91.4729		21	21	0		81	4	95.0617		105	3	97.1429		46	46	0		101
	29	29	0		85	2	97.6471		116	116	0		35	18	48.5714		70	18	74.2857		21	21	0		82	2	97.561		93	3	96.7742		17	17	0		70	17	75.7143		99	44	55.5556		44	44	0		89
	29	28	3.44828		83	2	97.5904		97	97	0		35	10	71.4286		63	0	100		20	20	0		80	0	100		88	23	73.8636		16	16	0		67	14	79.1045		96	11	88.5417		39	39	0		83
	27	27	0		82	2	97.561		91	91	0		34	13	61.7647		62	2	96.7742		17	17	0		69	2	97.1014		84	15	82.1429		15	15	0		62	17	72.5806		92	1	98.913		37	37	0		80
	20	20	0		79	1	98.7342		83	83	0		31	10	67.7419		59	19	67.7966		16	16	0		59	2	96.6102		80	7	91.25		14	14	0		58	40	31.0345		86	0	100		35	35	0		71
	12	12	0		77	2	97.4026		82	82	0		31	7	77.4194		56	25	55.3571		16	16	0		52	3	94.2308		77	48	37.6623		10	10	0		57	12	78.9474		86	0	100		33	33	0		70
	10	10	0		75	4	94.6667		72	72	0		28	19	32.1429		55	0	100		15	15	0		51	9	82.3529		68	35	48.5294		4	4	0		54	8	85.1852		85	0	100		31	31	0		68
	8	8	0		73	1	98.6301		67	67	0		27	13	51.8519		55	8	85.4545		15	15	0		47	10	78.7234		62	7	88.7097		0	0			48	16	66.6667		85	4	95.2941		30	30	0		67
	6	6	0		71	0	100		65	65	0		10	5	50		54	8	85.1852		14	14	0		46	1	97.8261		60	12	80		0	0			48	4	91.6667		80	3	96.25		30	30	0		61
	4	4	0		69	13	81.1594		61	61	0		9	3	66.6667		52	8	84.6154		12	12	0		46	7	84.7826		59	11	81.3559		0	0			46	35	23.913		77	10	87.013		25	25	0		59
	1	1	0		68	2	97.0588		60	60	0		5	3	40		52	1	98.0769		11	11	0		44	2	95.4545		58	9	84.4828		0	0			46	18	60.8696		75	2	97.3333		18	18	0		53
	0	0			66	23	65.1515		58	58	0		4	4	0		48	22	54.1667		7	7	0		42	5	88.0952		56	31	44.6429		0	0			43	23	46.5116		66	2	96.9697		14	14	0		51
	0	0			65	6	90.7692		48	48	0		0	0			47	4	91.4894		7	7	0		42	16	61.9048		54	11	79.6296		0	0			41	8	80.4878		58	1	98.2759		13	13	0		51
	0	0			65	11	83.0769		47	47	0		0	0			45	32	28.8889		6	6	0		40	1	97.5		53	20	62.2642		0	0			38	22	42.1053		55	0	100		11	11	0		49
	0	0			64	1	98.4375		45	45	0		0	0			42	2	95.2381		4	4	0		40	18	55		51	3	94.1176		0	0			38	28	26.3158		55	29	47.2727		10	10	0		46
					63	10	84.127		45	45	0						39	39	0		1	1	0		35	24	31.4286		50	11	78		0	0			37	6	83.7838		54	17	68.5185		8	8	0		44
	94	94	0		63	3	95.2381		45	45	0		127	19	85.0394		36	4	88.8889		1	1	0		35	4	88.5714		50	3	94		0	0			34	2	94.1176		52	5	90.3846		7	7	0		42
	93	92	1.07527		60	3	95		45	45	0		90	12	86.6667		36	1	97.2222		0	0			35	6	82.8571		46	46	0		0	0			34	9	73.5294		50	3	94		7	7	0		42
	91	91	0		58	8	86.2069		41	41	0		85	10	88.2353		35	0	100		0	0			34	34	0		38	7	81.5789		0	0			32	8	75		48	47	2.08333		1	1	0		40
	90	89	1.11111		52	30	42.3077		32	32	0		80	15	81.25		30	0	100		0	0			33	13	60.6061		38	1	97.3684		0	0			32	16	50		44	1	97.7273		0	0			37
	85	85	0		51	2	96.0784		29	29	0		75	9	88		29	0	100		0	0			31	3	90.3226		37	9	75.6757						31	5	83.871		43	1	97.6744		0	0			34
	77	77	0		49	6	87.7551		27	27	0		72	14	80.5556		22	3	86.3636		0	0			28	27	3.57143		37	4	89.1892						31	5	83.871		42	0	100		0	0			30
	76	76	0		49	3	93.8776		25	25	0		67	12	82.0896		21	7	66.6667		0	0			25	3	88		35	1	97.1429						30	6	80		41	2	95.122		0	0			29
	74	73	1.35135		48	0	100		20	20	0		65	9	86.1538		19	1	94.7368		0	0			25	4	84		35	7	80						28	24	14.2857		38	13	65.7895		0	0			29
	71	68	4.22535		46	1	97.8261		18	18	0		64	25	60.9375		17	17	0						12	0	100		33	16	51.5152						27	22	18.5185		33	3	90.9091		0	0			21
	71	70	1.40845		45	4	91.1111		18	18	0		62	15	75.8065		0	0							12	1	91.6667		29	3	89.6552						24	24	0		28	8	71.4286						20
	67	67	0		35	7	80		18	18	0		61	15	75.4098		0	0							11	11	0		20	1	95						22	6	72.7273		16	16	0						19
	66	66	0		35	13	62.8571		9	9	0		60	27	55		0	0							8	8	0		12	12	0						18	13	27.7778		16	16	0						15
	66	66	0		33	13	60.6061		4	4	0		56	18	67.8571		0	0							0	0			10	7	30						10	10	0		13	3	76.9231						4
	64	63	1.5625		30	6	80		1	1	0		56	7	87.5		0	0							0	0			4	3	25						0	0			12	5	58.3333						0
	62	60	3.22581		15	12	20		0	0			55	16	70.9091		0	0							0	0			0	0							0	0			11	11	0						0
	57	57	0		0	0			0	0			51	15	70.5882		0	0							0	0			0	0							0	0			3	3	0						0
	56	55	1.78571										49	12	75.5102
	54	53	1.85185										49	10	79.5918
	54	52	3.7037										47	15	68.0851
	52	52	0										45	14	68.8889
	45	45	0										45	18	60
	43	43	0										44	7	84.0909
	41	41	0										43	8	81.3953
	34	34	0										43	7	83.7209
	34	34	0										42	5	88.0952
	34	34	0										38	13	65.7895
	29	29	0										20	12	40
	25	25	0										14	5	64.2857
	22	22	0										13	13	0
	16	15	6.25										13	3	76.9231
	15	15	0										10	3	70
	2	2	0										8	8	0
[truncated: 2 more columns]

## Sheet: Fig. 2C
Figure 2C
Samples with fewer than 25 embryos were removed from analysis. Rationale described in methods. 0hr count and 30 hr count as the number of unhatched embryos. Replicate 1 and replicate 2 are seperated by a single empty row.
19HR25	19HR14
	Mother	Father			Mother	Father			Mother	Father			Mother	Father			Mother	Father			Mother	Father
	nos:VP16[-];ywT3[-]	nos:VP16[-];wMel cifA;cifB[-]			nos:VP16[-];ywT3[-]	nos:VP16[-];wMel cifA; wRec cifB[-]			nos:VP16[-];wRec cifA[-]	nos:VP16[-];wMel cifA;cifB[-]			nos:VP16[-];wRec cifA[-]	nos:VP16[-];wMel cifA; wRec cifB[-]			nos:VP16[-];wMel cifA[-]	nos:VP16[-];wMel cifA;cifB[-]			nos:VP16[-];wMel cifA[-]	nos:VP16[-];wMel cifA; wRec cifB[-]
	0 Hr Count	30 Hr Count	% Hatching		0 Hr Count	30 Hr Count	% Hatching		0 Hr Count	30 Hr Count	% Hatching		0 Hr Count	30 Hr Count	% Hatching		0 Hr Count	30 Hr Count	% Hatching		0 Hr Count	30 Hr Count	% Hatching
	120	120	0		127	16	87.4016		111	7	93.6937		101	0	100		110	2	98.1818		127	0	100
	115	113	1.73913		114	22	80.7018		101	1	99.0099		97	26	73.1959		107	2	98.1308		121	3	97.5207
	112	110	1.78571		113	12	89.3805		91	1	98.9011		89	0	100		93	19	79.5699		114	22	80.7018
	106	105	0.943396		97	22	77.3196		87	11	87.3563		82	1	98.7805		93	0	100		113	3	97.3451
	98	96	2.04082		92	14	84.7826		83	6	92.7711		81	1	98.7654		92	1	98.913		111	2	98.1982
	98	95	3.06122		89	13	85.3933		81	2	97.5309		78	0	100		92	3	96.7391		107	0	100
	97	96	1.03093		87	16	81.6092		77	0	100		78	5	93.5897		89	3	96.6292		103	3	97.0874
	97	96	1.03093		78	10	87.1795		76	1	98.6842		73	0	100		87	4	95.4023		103	4	96.1165
	93	92	1.07527		76	57	25		73	0	100		73	13	82.1918		87	0	100		101	1	99.0099
	87	87	0		73	22	69.863		68	0	100		71	1	98.5915		78	0	100		94	1	98.9362
	63	63	0		58	21	63.7931		62	4	93.5484		71	4	94.3662		73	1	98.6301		93	2	97.8495
	62	59	4.83871		56	56	0		62	0	100		69	17	75.3623		72	0	100		92	1	98.913
	53	52	1.88679		51	18	64.7059		59	3	94.9153		63	6	90.4762		71	1	98.5915		91	3	96.7033
	47	47	0		31	17	45.1613		57	21	63.1579		61	8	86.8852		52	1	98.0769		91	0	100
	26	26	0		24	24	0		49	0	100		59	0	100		23	1	95.6522		91	5	94.5055
	2	2	0		10	2	80		0	0			57	8	85.9649		0	0			89	0	100
													53	6	88.6792						87	5	94.2529
	18	1	94.4444		45	8	82.2222		48	0	100		52	1	98.0769		75	3	96		87	2	97.7011
	92	92	0		30	10	66.6667		60	0	100		52	3	94.2308		94	1	98.9362		87	4	95.4023
	103	103	0		70	39	44.2857		0	0			47	9	80.8511		21	21	0		87	0	100
	76	76	0		57	4	92.9825		53	2	96.2264		46	2	95.6522		26	3	88.4615		82	0	100
	47	47	0		58	9	84.4828		24	12	50		43	9	79.0698		9	9	0		82	1	98.7805
	78	78	0		75	11	85.3333		36	0	100		36	7	80.5556		49	17	65.3061		80	1	98.75
	24	24	0		58	8	86.2069		25	0	100		30	1	96.6667		45	2	95.5556		79	2	97.4684
	84	84	0		36	8	77.7778		58	0	100		26	13	50		58	13	77.5862		78	3	96.1538
	41	34	17.0732		21	21	0		64	0	100		18	4	77.7778		60	14	76.6667		78	2	97.4359
	59	56	5.08475		65	20	69.2308		48	11	77.0833		0	0			56	24	57.1429		73	12	83.5616
	88	88	0		116	9	92.2414		52	0	100		0	0			39	1	97.4359		53	10	81.1321
	23	22	4.34783		103	32	68.932		0	0			0	0			46	7	84.7826		46	0	100
	62	59	4.83871		44	7	84.0909		0	0			0	0			10	2	80		42	2	95.2381
	0	0			34	34	0		40	2	95		0	0			52	0	100		0	0
	22	22	0		41	4	90.2439		54	1	98.1481		0	0			69	0	100		0	0
	77	57	25.974		90	14	84.4444		28	1	96.4286						41	11	73.1707
	44	43	2.27273		7	3	57.1429		38	3	92.1053		60	1	98.3333		31	14	54.8387		86	0	100
	42	41	2.38095		107	25	76.6355		59	0	100		0	0			83	3	96.3855		53	0	100
	78	78	0		87	22	74.7126		67	0	100		8	8	0		102	2	98.0392		59	2	96.6102
	0	0			89	18	79.7753		78	2	97.4359		5	0	100		40	40	0		31	2	93.5484
	110	110	0		51	17	66.6667		14	0	100		0	0			34	3	91.1765		44	13	70.4545
	49	48	2.04082		63	0	100		52	4	92.3077		13	12	7.69231		70	26	62.8571		8	8	0
	69	69	0		48	25	47.9167		46	0	100		33	2	93.9394		7	7	0		73	5	93.1507
	70	51	27.1429		66	61	7.57576		7	3	57.1429		0	0			89	3	96.6292		2	2	0
	0	0			36	7	80.5556		43	0	100		58	1	98.2759		79	0	100		23	0	100
	70	70	0		48	16	66.6667		0	0			0	0			17	2	88.2353		47	0	100
	68	68	0		93	19	79.5699		58	0	100		0	0			44	15	65.9091		40	8	80
	83	83	0		77	15	80.5195		46	2	95.6522		0	0			58	16	72.4138		48	14	70.8333
	72	72	0		56	13	76.7857		2	1	50		97	12	87.6289		0	0			58	16	72.4138
	81	81	0		53	14	73.5849		39	3	92.3077		43	0	100		74	4	94.5946		48	8	83.3333
	91	91	0		81	31	61.7284		74	0	100		0	0			75	6	92		0	0
	0	0			53	19	64.1509		51	4	92.1569		13	13	0		53	17	67.9245		52	24	53.8462
													0	0							77	0	100
													0	0							57	21	63.1579
													0	0							71	22	69.0141
													0	0							41	1	97.561
													79	3	96.2025						23	23	0
													0	0							80	17	78.75
													0	0							0	0
													45	1	97.7778						1	1	0
													52	4	92.3077						78	4	94.8718
													17	0	100						39	7	82.0513
													69	0	100						49	44	10.2041
													46	2	95.6522						60	16	73.3333
													55	18	67.2727						67	0	100
													0	0							66	5	92.4242
													20	10	50						54	21	61.1111
													16	16	0						27	13	51.8519

## Sheet: Fig. 2D
Figure 2D
Samples with fewer than 25 embryos were removed from analysis. Rationale described in methods. 0hr count and 30 hr count as the number of unhatched embryos. Replicate 1 and replicate 2 are seperated by a single empty row.
19hr31	19hr27
	Mother	Father			Mother	Father			Mother	Father			Mother	Father			Mother	Father			Mother	Father
	nos:VP16[-];ywT3[-]	nos:VP16[-];wMel cifA;cifB[-]			nos:VP16[-];ywT3[-]	nos:VP16[-];wRec cifA; wMel cifB[-]			nos:VP16[-];wRec cifA[-]	nos:VP16[-];wMel cifA;cifB[-]			nos:VP16[-];wRec cifA[-]	nos:VP16[-];wRec cifA; wMel cifB[-]			nos:VP16[-];wMel cifA[-]	nos:VP16[-];wMel cifA;cifB[-]			nos:VP16[-];wMel cifA[-]	nos:VP16[-];wRec cifA; wMel cifB[-]
	0 Hr Count	30 Hr Count	% Hatching		0 Hr Count	30 Hr Count	% Hatching		0 Hr Count	30 Hr Count	% Hatching		0 Hr Count	30 Hr Count	% Hatching		0 Hr Count	30 Hr Count	% Hatching		0 Hr Count	30 Hr Count	% Hatching
	119	117	1.68067		110	12	89.0909		110	0	100		108	4	96.2963		105	4	96.1905		111	2	98.1982
	112	111	0.892857		101	100	0.990099		108	1	99.0741		107	0	100		103	1	99.0291		106	0	100
	109	109	0		92	91	1.08696		97	0	100		104	8	92.3077		76	3	96.0526		104	2	98.0769
	105	105	0		88	6	93.1818		86	14	83.7209		103	1	99.0291		72	16	77.7778		97	4	95.8763
	103	103	0		87	87	0		79	79	0		96	0	100		72	2	97.2222		96	2	97.9167
	100	99	1		84	84	0		66	8	87.8788		95	2	97.8947		69	2	97.1014		96	3	96.875
	94	93	1.06383		80	80	0		63	3	95.2381		92	0	100		64	2	96.875		93	1	98.9247
	87	87	0		78	77	1.28205		48	4	91.6667		82	0	100		56	0	100		92	7	92.3913
	83	83	0		73	73	0		45	15	66.6667		81	10	87.6543		50	2	96		91	2	97.8022
	82	82	0		64	1	98.4375		41	2	95.122		74	7	90.5405		49	2	95.9184		80	17	78.75
	78	78	0		64	1	98.4375		40	5	87.5		71	12	83.0986		48	17	64.5833		77	0	100
	77	77	0		63	63	0		36	2	94.4444		69	2	97.1014		39	4	89.7436		74	13	82.4324
	77	77	0		48	48	0		33	1	96.9697		68	4	94.1176		28	3	89.2857		68	7	89.7059
	74	74	0		42	42	0		30	5	83.3333		66	1	98.4848		19	0	100		63	0	100
	73	73	0		42	42	0		11	11	0		64	0	100		0	0			61	6	90.1639
	66	66	0		41	41	0		0	0			59	1	98.3051		0	0			59	2	96.6102
	66	66	0		39	4	89.7436						55	1	98.1818						58	31	46.5517
	47	47	0		39	39	0		121	8	93.3884		55	2	96.3636		138	0	100		55	6	89.0909
	43	43	0		38	38	0		101	1	99.0099		48	6	87.5		129	0	100		54	14	74.0741
	41	41	0		36	36	0		93	1	98.9247		41	1	97.561		113	4	96.4602		51	7	86.2745
	37	37	0		33	11	66.6667		89	0	100		36	0	100		110	2	98.1818		50	2	96
	37	37	0		33	33	0		81	2	97.5309		33	1	96.9697		106	4	96.2264		42	7	83.3333
	35	35	0		29	10	65.5172		78	2	97.4359		30	1	96.6667		105	1	99.0476		41	0	100
	34	34	0		25	25	0		76	2	97.3684		24	24	0		102	7	93.1373		39	1	97.4359
	29	29	0		24	0	100		74	5	93.2432		20	1	95		94	2	97.8723		37	2	94.5946
	28	28	0		16	16	0		52	0	100		19	19	0		88	1	98.8636		34	34	0
	21	21	0		15	0	100		46	13	71.7391		18	3	83.3333		84	2	97.619		31	0	100
	8	8	0		13	13	0		43	11	74.4186		17	17	0		82	1	98.7805		15	15	0
	5	5	0		10	10	0		42	1	97.619		12	12	0		81	1	98.7654		0	0
	0	0			9	9	0		26	19	26.9231		5	1	80		76	47	38.1579		0	0
	0	0			4	4	0		15	1	93.3333		0	0			76	74	2.63158		0	0
	0	0			0	0			9	0	100		0	0			67	10	85.0746		0	0
									0	0							67	2	97.0149
	90	90	0		123	120	2.43902						104	2	98.0769		66	4	93.9394		137	1	99.2701
	88	88	0		106	105	0.943396						90	2	97.7778		64	1	98.4375		124	1	99.1935
	80	80	0		105	0	100						59	1	98.3051		60	2	96.6667		108	3	97.2222
	66	64	3.0303		96	1	98.9583						52	1	98.0769		59	56	5.08475		101	0	100
	52	52	0		95	95	0						42	4	90.4762		58	0	100		100	0	100
	46	46	0		93	0	100						32	11	65.625		58	15	74.1379		87	1	98.8506
	34	34	0		84	84	0						28	28	0		57	1	98.2456		86	1	98.8372
	28	27	3.57143		82	82	0						28	14	50		54	11	79.6296		82	2	97.561
	19	19	0		73	73	0						26	1	96.1538		53	7	86.7925		81	6	92.5926
	16	16	0		72	72	0						25	8	68		48	4	91.6667		79	7	91.1392
	13	13	0		66	9	86.3636						14	0	100		41	9	78.0488		78	0	100
	13	13	0		62	39	37.0968						13	10	23.0769		39	7	82.0513		76	2	97.3684
	9	9	0		54	53	1.85185						9	9	0		32	1	96.875		75	5	93.3333
	7	7	0		50	50	0						0	0			30	2	93.3333		75	0	100
	0	0			50	2	96						0	0			15	15	0		73	3	95.8904
	0	0			47	47	0						0	0			0	0			72	1	98.6111
					46	46	0														70	11	84.2857
					38	36	5.26316														67	20	70.1493
					36	36	0														66	2	96.9697
					33	33	0														63	38	39.6825
					31	31	0														61	4	93.4426
					27	27	0														58	0	100
					26	26	0														56	17	69.6429
					25	25	0														54	5	90.7407
					25	25	0														44	16	63.6364
					24	24	0														42	42	0
					21	21	0														41	12	70.7317
					16	16	0														38	10	73.6842
					7	7	0														37	2	94.5946
					1	1	0														32	9	71.875
					0	0															25	2	92
					0	0															0	0

## Sheet: Fig. 3B
Figure 3B
Samples with fewer than 25 embryos were removed from analysis. Rationale described in methods. 0hr count and 30 hr count as the number of unhatched embryos. Replicate 1 and replicate 2 are seperated by a single empty row.
19HR22	19HR08
	Mother	Father			Mother	Father			Mother	Father			Mother	Father			Mother	Father			Mother	Father			Mother	Father			Mother	Father			Mother	Father			Mother	Father			Mother	Father			Mother	Father			Mother
	nos:VP16[-];ywT3[-]	nos:VP16[-];wMel cifA;cifB[-]			nos:VP16[-];ywT3[-]	nos:VP16[-];wRi cifAT1[-]			nos:VP16[-];ywT3[-]	nos:VP16[-];wRi cifBT1[T2A][-]			nos:VP16[-];ywT3[-]	nos:VP16[-];wRi cifAT1;cifBT1[T2A][-]			nos:VP16[-];wRi cifAT1[-]	nos:VP16[-];wMel cifA;cifB[-]			nos:VP16[-];wRi cifAT1[-]	nos:VP16[-];wRi cifBT1[T2A][-]			nos:VP16[-];wRi cifAT1[-]	nos:VP16[-];wRi cifAT1;cifBT1[T2A][-]			nos:VP16[-];wRi cifAT1;cifBT1[T2A][-]	nos:VP16[-];wMel cifA;cifB[-]			nos:VP16[-];wRi cifAT1;cifBT1[T2A][-]	nos:VP16[-];wRi cifBT1[T2A][-]			nos:VP16[-];wRi cifAT1;cifBT1[T2A][-]	nos:VP16[-];wRi cifAT1;cifBT1[T2A][-]			nos:VP16[-];wMel cifA[-]	nos:VP16[-];wMel cifA;cifB[-]			nos:VP16[-];wMel cifA[-]	nos:VP16[-];wRi cifBT1[T2A][-]			nos:VP16[-];wMel cifA[-]
	0 Hr Count	30 Hr Count	% Hatching		0 Hr Count	30 Hr Count	% Hatching		0 Hr Count	30 Hr Count	% Hatching		0 Hr Count	30 Hr Count	% Hatching		0 Hr Count	30 Hr Count	% Hatching		0 Hr Count	30 Hr Count	% Hatching		0 Hr Count	30 Hr Count	% Hatching		0 Hr Count	30 Hr Count	% Hatching		0 Hr Count	30 Hr Count	% Hatching		0 Hr Count	30 Hr Count	% Hatching		0 Hr Count	30 Hr Count	% Hatching		0 Hr Count	30 Hr Count	% Hatching		0 Hr Count
	111	110	0.900901		115	7	93.913		106	1	99.0566		111	2	98.1982		87	7	91.954		73	0	100		99	1	98.9899		92	6	93.4783		99	5	94.9495		93	6	93.5484		97	3	96.9072		91	0	100		92
	99	99	0		113	3	97.3451		93	0	100		107	0	100		81	2	97.5309		71	7	90.1408		78	1	98.7179		68	22	67.6471		82	3	96.3415		85	2	97.6471		91	1	98.9011		87	1	98.8506		91
	97	97	0		107	1	99.0654		92	3	96.7391		94	2	97.8723		73	3	95.8904		68	0	100		71	0	100		68	0	100		78	1	98.7179		76	1	98.6842		91	1	98.9011		81	2	97.5309		89
	94	92	2.12766		103	0	100		90	1	98.8889		93	3	96.7742		71	0	100		67	1	98.5075		70	1	98.5714		64	2	96.875		68	1	98.5294		75	0	100		89	4	95.5056		77	3	96.1039		87
	93	92	1.07527		102	1	99.0196		87	1	98.8506		89	0	100		67	2	97.0149		63	0	100		63	3	95.2381		61	1	98.3607		63	1	98.4127		66	0	100		83	1	98.7952		73	2	97.2603		76
	88	87	1.13636		89	3	96.6292		80	1	98.75		83	5	93.9759		63	1	98.4127		61	1	98.3607		62	0	100		55	2	96.3636		57	0	100		59	4	93.2203		72	3	95.8333		69	2	97.1014		72
	83	83	0		86	2	97.6744		78	2	97.4359		78	0	100		63	1	98.4127		60	1	98.3333		60	0	100		49	0	100		54	0	100		57	0	100		72	2	97.2222		69	2	97.1014		61
	80	79	1.25		86	0	100		76	2	97.3684		76	1	98.6842		61	1	98.3607		59	2	96.6102		60	1	98.3333		49	2	95.9184		52	2	96.1538		52	5	90.3846		63	1	98.4127		63	1	98.4127		61
	71	70	1.40845		77	1	98.7013		76	2	97.3684		72	23	68.0556		58	1	98.2759		58	3	94.8276		59	5	91.5254		42	0	100		47	47	0		50	45	10		61	1	98.3607		62	1	98.3871		53
	67	67	0		74	4	94.5946		75	3	96		68	3	95.5882		57	1	98.2456		54	3	94.4444		57	0	100		37	6	83.7838		39	2	94.8718		49	0	100		52	1	98.0769		61	0	100		51
	67	67	0		71	3	95.7746		72	12	83.3333		62	3	95.1613		54	0	100		53	0	100		53	53	0		35	7	80		22	3	86.3636		22	8	63.6364		52	15	71.1538		53	1	98.1132		45
	56	56	0		60	7	88.3333		62	3	95.1613		61	2	96.7213		52	1	98.0769		51	1	98.0392		51	0	100		32	0	100		1	1	0		11	3	72.7273		51	2	96.0784		53	1	98.1132		41
	55	55	0		57	1	98.2456		61	1	98.3607		61	7	88.5246		49	1	97.9592		48	1	97.9167		49	3	93.8776		30	5	83.3333		0	0			0	0			43	1	97.6744		51	2	96.0784		37
	42	41	2.38095		57	0	100		60	11	81.6667		58	1	98.2759		48	0	100		43	1	97.6744		45	2	95.5556		28	3	89.2857		0	0			0	0			41	31	24.3902		48	0	100		32
	42	42	0		50	3	94		56	1	98.2143		58	6	89.6552		26	10	61.5385		27	4	85.1852		12	1	91.6667		21	0	100		0	0			0	0			0	0			37	6	83.7838		1
	40	40	0		48	1	97.9167		55	1	98.1818		52	1	98.0769		12	3	75		0	0			0	0			1	1	0		0	0			0	0							0	0			0
	38	38	0		41	7	82.9268		54	3	94.4444		51	1	98.0392										0	0															2	0	100
	37	37	0		33	2	93.9394		54	6	88.8889		47	10	78.7234		60	0	100		93	1	98.9247		0	0			67	0	100		63	1	98.4127		55	1	98.1818		61	1	98.3607		7	0	100		108
	37	37	0		33	33	0		51	2	96.0784		44	7	84.0909		86	3	96.5116		131	4	96.9466						66	0	100		30	2	93.3333		39	1	97.4359		38	10	73.6842		23	23	0		80
	35	34	2.85714		31	7	77.4194		47	2	95.7447		33	3	90.9091		52	3	94.2308		13	10	23.0769		67	2	97.0149		57	4	92.9825		52	6	88.4615		0	0			118	2	98.3051		57	4	92.9825		41
	32	30	6.25		17	15	11.7647		44	1	97.7273		31	0	100		16	0	100		54	0	100		0	0			41	2	95.122		21	3	85.7143		0	0			92	2	97.8261		60	0	100		64
	28	28	0		16	16	0		43	13	69.7674		30	1	96.6667		21	7	66.6667		59	8	86.4407		92	1	98.913		69	3	95.6522		64	1	98.4375		19	1	94.7368		92	0	100		0	0			80
	25	25	0		15	2	86.6667		43	2	95.3488		28	3	89.2857		75	5	93.3333		69	18	73.913		44	19	56.8182		43	5	88.3721		31	6	80.6452		32	0	100		16	16	0		109	0	100		77
	24	24	0		13	4	69.2308		42	1	97.619		24	3	87.5		15	8	46.6667		105	4	96.1905		51	9	82.3529		55	3	94.5455		48	3	93.75		67	1	98.5075		54	7	87.037		127	5	96.063		65
	20	20	0		13	2	84.6154		39	9	76.9231		22	13	40.9091		98	1	98.9796		85	2	97.6471		132	1	99.2424		45	4	91.1111		43	0	100		58	2	96.5517		38	5	86.8421		123	2	98.374		97
	14	14	0		8	1	87.5		31	7	77.4194		13	13	0		44	0	100		73	15	79.4521		116	1	99.1379		36	1	97.2222		26	12	53.8462		53	0	100		107	2	98.1308		79	1	98.7342		116
	11	11	0		0	0			30	2	93.3333		13	3	76.9231		85	2	97.6471		24	24	0		0	0			49	0	100		15	1	93.3333		0	0			0	0			76	1	98.6842		84
	7	7	0		0	0			20	0	100		13	4	69.2308		97	2	97.9381		32	8	75		70	1	98.5714		42	0	100		29	0	100		31	4	87.0968		43	5	88.3721		36	0	100		52
	1	1	0		0	0			15	15	0		1	1	0		3	0	100		46	46	0		62	12	80.6452		26	26	0		14	1	92.8571		10	5	50		0	0			106	10	90.566		28
	0	0			0	0			10	1	90		0	0			50	0	100		40	2	95		129	6	95.3488		65	1	98.4615		58	3	94.8276		46	5	89.1304		1	1	0		63	0	100		0
	0	0							2	2	0		0	0			74	2	97.2973		72	0	100		0	0			18	0	100		26	1	96.1538		40	3	92.5		9	9	0		104	0	100		72
	0	0			93	0	100		0	0			0	0			123	8	93.4959		128	5	96.0938		12	0	100		0	0			47	47	0		17	0	100		72	1	98.6111		68	30	55.8824		69
					66	1	98.4848										0	0			76	4	94.7368		0	0			32	0	100		0	0			80	3	96.25		29	0	100		32	0	100		67
	87	87	0		23	0	100		79	0	100		63	7	88.8889						0	0			70	1	98.5714		74	1	98.6486		44	1	97.7273		54	2	96.2963		28	1	96.4286		73	2	97.2603		51
	93	91	2.15054		42	6	85.7143		60	0	100		73	7	90.411						76	1	98.6842		45	3	93.3333		46	1	97.8261		0	0			22	1	95.4545		91	2	97.8022		51	1	98.0392		122
	67	67	0		94	3	96.8085		49	5	89.7959		0	0							69	3	95.6522		88	2	97.7273		58	0	100		25	1	96		8	8	0		73	2	97.2603		83	1	98.7952		94
	0	0			85	1	98.8235		50	3	94		73	37	49.3151						0	0			0	0			28	4	85.7143		26	6	76.9231		89	1	98.8764		20	2	90		76	0	100		38
	31	31	0		17	6	64.7059		89	3	96.6292		58	19	67.2414						27	6	77.7778		55	1	98.1818		43	3	93.0233		35	3	91.4286		0	0			22	1	95.4545		52	11	78.8462		96
	104	104	0		58	28	51.7241		94	4	95.7447		20	2	90						78	17	78.2051		40	13	67.5		61	1	98.3607		65	9	86.1538		0	0			18	3	83.3333		0	0			80
	79	79	0		31	1	96.7742		86	4	95.3488		43	8	81.3953						0	0			1	1	0		70	11	84.2857		95	2	97.8947		62	2	96.7742		73	1	98.6301		43	5	88.3721		96
	55	55	0		41	1	97.561		53	8	84.9057		56	8	85.7143						2	2	0		85	2	97.6471		9	1	88.8889		16	16	0		82	1	98.7805		86	3	96.5116		76	3	96.0526		38
	32	32	0		74	2	97.2973		61	1	98.3607		62	9	85.4839						0	0			77	4	94.8052		40	0	100		23	23	0		0	0			82	0	100		5	5	0		36
	72	72	0		100	2	98		10	0	100		61	6	90.1639						49	0	100		94	0	100		17	1	94.1176		63	0	100		0	0			85	3	96.4706		11	0	100		48
	17	17	0		69	4	94.2029		72	2	97.2222		66	2	96.9697										89	2	97.7528		94	2	97.8723		54	2	96.2963		0	0			29	0	100		73	1	98.6301		48
	89	89	0		0	0			107	2	98.1308		42	7	83.3333										36	20	44.4444		56	17	69.6429		57	0	100		19	2	89.4737		44	1	97.7273		50	1	98		16
	63	63	0		107	4	96.2617		67	1	98.5075		102	4	96.0784														0	0			16	1	93.75		71	3	95.7746		0	0			0	0			69
	63	63	0		92	5	94.5652		25	0	100		48	1	97.9167														58	3	94.8276		69	0	100		61	1	98.3607		52	2	96.1538		66	2	96.9697		60
	0	0							17	10	41.1765		45	1	97.7778														66	1	98.4848		0	0			68	4	94.1176		10	10	0		52	1	98.0769		0
	5	5	0						17	1	94.1176		98	23	76.5306														59	1	98.3051		5	5	0		59	1	98.3051						72	0	100		41
									0	0
									86	5	94.186
									73	7	90.411
									76	1	98.6842
									6	1	83.3333
									62	12	80.6452
[truncated: 2 more columns]

## Sheet: Fig. 3C
Figure 3C
Samples with fewer than 25 embryos were removed from analysis. Rationale described in methods. 0hr count and 30 hr count as the number of unhatched embryos. Replicate 1 and replicate 2 are seperated by a single empty row.
19HR24	19HR17
	Mother	Father			Mother	Father			Mother	Father			Mother	Father			Mother	Father			Mother	Father
	nos:VP16[-];ywT3[-]	nos:VP16[-];wMel cifA;cifB[-]			nos:VP16[-];ywT3[-]	nos:VP16[-];wMel cifA; wRi cifB[T2A][-]			nos:VP16[-];wRi cifA[T1][-]	nos:VP16[-];wMel cifA;cifB[-]			nos:VP16[-];wRi cifA[T1][-]	nos:VP16[-];wMel cifA; wRi cifB[T2A][-]			nos:VP16[-];wMel cifA[-]	nos:VP16[-];wMel cifA;cifB[-]			nos:VP16[-];wMel cifA[-]	nos:VP16[-];wMel cifA; wRi cifB[T2A][-]
	0 Hr Count	30 Hr Count	% Hatching		0 Hr Count	30 Hr Count	% Hatching		0 Hr Count	30 Hr Count	% Hatching		0 Hr Count	30 Hr Count	% Hatching		0 Hr Count	30 Hr Count	% Hatching		0 Hr Count	30 Hr Count	% Hatching
	13	13	0		6	6	0		0	0			17	2	88.2353		115	2	98.2609		98	31	68.3673
	76	76	0		72	0	100		57	2	96.4912		89	9	89.8876		98	1	98.9796		87	3	96.5517
	107	105	1.86916		52	2	96.1538		72	0	100		54	3	94.4444		87	0	100		72	12	83.3333
	63	63	0		91	2	97.8022		50	0	100		42	0	100		92	5	94.5652		93	0	100
	51	51	0		113	4	96.4602		49	0	100		83	11	86.747		71	2	97.1831		85	3	96.4706
	86	85	1.16279		85	3	96.4706		0	0			75	2	97.3333		59	2	96.6102		107	0	100
	68	68	0		73	1	98.6301		91	1	98.9011		97	2	97.9381		63	2	96.8254		73	0	100
	0	0			97	3	96.9072		79	3	96.2025		61	2	96.7213		0	0			120	4	96.6667
	38	38	0		112	60	46.4286		40	1	97.5		103	8	92.233		68	1	98.5294		0	0
	111	111	0		103	15	85.4369		70	3	95.7143		0	0			81	2	97.5309		117	1	99.1453
	90	89	1.11111		9	9	0		53	0	100		87	3	96.5517		94	2	97.8723		105	2	98.0952
	103	103	0		67	1	98.5075		86	1	98.8372		0	0			83	3	96.3855		87	0	100
	122	121	0.819672		76	1	98.6842		62	2	96.7742		98	4	95.9184		91	3	96.7033		0	0
	114	113	0.877193		120	6	95		76	1	98.6842		0	0			72	1	98.6111		92	11	88.0435
	88	87	1.13636		92	5	94.5652		15	15	0		101	5	95.0495		93	2	97.8495		0	0
	79	77	2.53165		68	1	98.5294		57	2	96.4912		107	1	99.0654		101	4	96.0396		103	2	98.0583
					98	7	92.8571						71	1	98.5915						73	32	56.1644
	67	67	0		0	0			0	0			121	2	98.3471		35	4	88.5714		69	0	100
	54	54	0		71	2	97.1831		30	5	83.3333		86	6	93.0233		26	1	96.1538		82	10	87.8049
	100	100	0		125	5	96		32	4	87.5		71	1	98.5915		67	0	100		112	0	100
	27	27	0		124	4	96.7742		22	21	4.54545		60	3	95		57	15	73.6842		52	1	98.0769
	51	51	0		111	68	38.7387		63	6	90.4762		68	2	97.0588		93	1	98.9247		107	1	99.0654
	107	107	0		106	1	99.0566		74	0	100		73	2	97.2603		89	0	100		121	2	98.3471
	61	61	0		119	3	97.479		71	1	98.5915		24	2	91.6667		66	2	96.9697		73	0	100
	66	66	0		79	0	100		49	9	81.6327		52	3	94.2308		93	5	94.6237		48	48	0
	90	90	0		50	11	78		0	0			58	0	100		90	1	98.8889		52	1	98.0769
	74	72	2.7027		97	6	93.8144		0	0			0	0			35	7	80		63	5	92.0635
	85	85	0		87	4	95.4023		0	0			49	4	91.8367		72	2	97.2222		87	2	97.7011
	84	84	0						50	6	88		55	1	98.1818		54	2	96.2963		81	4	95.0617
	74	74	0		62	0	100		48	13	72.9167		46	12	73.913		51	51	0		91	0	100
	82	82	0		25	1	96		0	0			89	7	92.1348		73	13	82.1918		47	1	97.8723
	86	86	0		73	6	91.7808		51	11	78.4314		103	2	98.0583		31	0	100		76	0	100
	78	77	1.28205		24	24	0		12	5	58.3333						80	2	97.5
	101	101	0		43	0	100		13	6	53.8462		51	18	64.7059		89	0	100		90	0	100
	65	65	0		37	5	86.4865		44	4	90.9091		52	0	100		40	34	15		70	1	98.5714
	84	84	0		63	21	66.6667		14	14	0		63	1	98.4127		79	0	100		61	1	98.3607
	118	118	0		100	3	97		13	0	100		35	10	71.4286		79	24	69.6203		58	2	96.5517
	90	90	0		61	1	98.3607		62	9	85.4839		30	27	10		11	0	100		60	12	80
	105	105	0		74	3	95.9459		55	15	72.7273		58	3	94.8276		70	0	100		0	0
	64	64	0		83	1	98.7952		33	33	0		7	7	0		76	2	97.3684		98	1	98.9796
	0	0			53	4	92.4528		31	4	87.0968		0	0			42	12	71.4286		37	37	0
	82	81	1.21951		81	8	90.1235		75	0	100		30	2	93.3333		71	0	100		120	4	96.6667
	40	40	0		19	10	47.3684		42	12	71.4286		60	3	95		64	7	89.0625		92	1	98.913
	64	64	0		75	6	92		47	43	8.51064		31	16	48.3871		33	3	90.9091		42	1	97.619
	61	61	0		78	3	96.1538		72	4	94.4444		35	14	60		54	0	100		52	3	94.2308
	85	85	0		61	0	100		15	15	0		25	7	72		79	4	94.9367		40	15	62.5
	89	88	1.1236		74	6	91.8919		27	1	96.2963		69	6	91.3043		53	11	79.2453		97	2	97.9381
	84	84	0		92	7	92.3913		21	0	100		34	2	94.1176		20	20	0		10	0	100
	69	69	0		70	10	85.7143		2	2	0		49	1	97.9592		83	2	97.5904		52	52	0
					78	2	97.4359						48	2	95.8333						39	1	97.4359
					52	4	92.3077						44	4	90.9091						48	0	100
					57	55	3.50877						23	0	100						0	0
					74	4	94.5946						25	23	8						66	0	100
					64	3	95.3125						26	1	96.1538						108	107	0.925926
					114	12	89.4737						7	0	100						41	41	0
					77	2	97.4026						22	22	0						14	14	0
					78	7	91.0256						90	2	97.7778						84	0	100
					32	32	0						86	7	91.8605						35	3	91.4286
					60	0	100						28	8	71.4286						83	4	95.1807
					72	1	98.6111						94	3	96.8085						41	40	2.43902
					108	6	94.4444						49	8	83.6735						52	16	69.2308
													14	14	0						13	13	0
													16	15	6.25						85	0	100
													0	0							58	1	98.2759
													97	0	100						62	0	100

## Sheet: Fig. 3D
Figure 3D
Samples with fewer than 25 embryos were removed from analysis. Rationale described in methods. 0hr count and 30 hr count as the number of unhatched embryos. Replicate 1 and replicate 2 are seperated by a single empty row.
19HR28	19HR20
	Mother	Father			Mother	Father			Mother	Father			Mother	Father			Mother	Father			Mother	Father
	nos:VP16[-];ywT3[-]	nos:VP16[-];wMel cifA;cifB[-]			nos:VP16[-];ywT3[-]	nos:VP16[-];wRi cifA; wMel cifB[-]			nos:VP16[-];wRi cifA[T1][-]	nos:VP16[-];wMel cifA;cifB[-]			nos:VP16[-];wRi cifA[T1][-]	nos:VP16[-];wRi cifA; wMel cifB[-]			nos:VP16[-];wMel cifA[-]	nos:VP16[-];wMel cifA;cifB[-]			nos:VP16[-];wMel cifA[-]	nos:VP16[-];wRi cifA; wMel cifB[5'][-]
	0 Hr Count	30 Hr Count	% Hatching		0 Hr Count	30 Hr Count	% Hatching		0 Hr Count	30 Hr Count	% Hatching		0 Hr Count	30 Hr Count	% Hatching		0 Hr Count	30 Hr Count	% Hatching		0 Hr Count	30 Hr Count	% Hatching
	100	97	3		118	112	5.08475		89	0	100		127	11	91.3386		103	0	100		139	13	90.6475
	86	86	0		112	110	1.78571		72	0	100		104	1	99.0385		98	27	72.449		118	1	99.1525
	79	79	0		112	102	8.92857		71	7	90.1408		69	2	97.1014		98	2	97.9592		114	7	93.8596
	58	58	0		109	106	2.75229		49	13	73.4694		48	21	56.25		91	1	98.9011		114	1	99.1228
	54	54	0		103	99	3.8835		45	6	86.6667		39	1	97.4359		88	0	100		101	0	100
	51	51	0		100	93	7		41	12	70.7317		38	4	89.4737		87	83	4.5977		92	1	98.913
	48	47	2.08333		100	94	6		36	16	55.5556		36	3	91.6667		81	4	95.0617		89	0	100
	31	31	0		91	83	8.79121		32	0	100		31	20	35.4839		76	22	71.0526		87	4	95.4023
	28	28	0		70	68	2.85714		23	8	65.2174		20	2	90		70	4	94.2857		82	8	90.2439
	22	22	0		69	61	11.5942		20	15	25		16	8	50		68	66	2.94118		80	2	97.5
	18	18	0		62	57	8.06452		15	13	13.3333		10	10	0		64	62	3.125		75	2	97.3333
	15	15	0		61	59	3.27869		10	2	80		10	0	100		63	11	82.5397		65	44	32.3077
	2	2	0		54	54	0		8	6	25		4	3	25		54	6	88.8889		60	24	60
	2	2	0		50	45	10		4	4	0		1	0	100		52	11	78.8462		57	4	92.9825
	1	1	0		46	45	2.17391		0	0			0	0			45	13	71.1111		42	8	80.9524
	0	0			42	41	2.38095		0	0			0	0			32	5	84.375		38	38	0
					38	35	7.89474
	120	118	1.66667		37	33	10.8108		138	0	100		143	19	86.7133		141	3	97.8723		169	3	98.2249
	116	116	0		31	30	3.22581		105	7	93.3333		121	21	82.6446		139	1	99.2806		152	2	98.6842
	99	99	0		28	27	3.57143		92	1	98.913		100	29	71		132	24	81.8182		130	1	99.2308
	99	99	0		25	24	4		86	85	1.16279		96	2	97.9167		119	1	99.1597		128	2	98.4375
	93	92	1.07527		17	17	0		73	12	83.5616		65	2	96.9231		118	3	97.4576		127	16	87.4016
	79	79	0		16	16	0		63	6	90.4762		64	1	98.4375		115	3	97.3913		126	1	99.2063
	75	75	0		14	14	0		53	13	75.4717		64	6	90.625		110	4	96.3636		101	21	79.2079
	68	67	1.47059		14	14	0		49	8	83.6735		48	8	83.3333		109	0	100		100	2	98
	66	66	0		7	7	0		49	14	71.4286		47	6	87.234		100	2	98		97	0	100
	66	64	3.0303		5	5	0		47	47	0		46	16	65.2174		97	0	100		92	6	93.4783
	63	62	1.5873		1	1	0		42	6	85.7143		44	6	86.3636		97	15	84.5361		91	3	96.7033
	62	62	0		1	1	0		41	14	65.8537		42	4	90.4762		94	1	98.9362		82	0	100
	53	53	0		0	0			39	3	92.3077		39	2	94.8718		89	89	0		81	16	80.2469
	51	51	0		0	0			37	37	0		36	14	61.1111		66	2	96.9697		80	3	96.25
	50	50	0		0	0			36	2	94.4444		35	4	88.5714		65	0	100		77	13	83.1169
	48	48	0						36	11	69.4444		34	12	64.7059		58	12	79.3103		74	13	82.4324
	45	45	0		116	114	1.72414		30	7	76.6667		33	19	42.4242		58	4	93.1034		72	9	87.5
	42	42	0		116	112	3.44828		28	1	96.4286		31	5	83.871		55	2	96.3636		67	35	47.7612
	41	41	0		110	52	52.7273		28	28	0		29	13	55.1724		47	11	76.5957		66	13	80.303
	39	39	0		90	90	0		28	28	0		22	6	72.7273		46	36	21.7391		64	7	89.0625
	39	39	0		76	70	7.89474		27	5	81.4815		15	2	86.6667		45	24	46.6667		60	37	38.3333
	34	34	0		74	72	2.7027		27	1	96.2963		13	13	0		38	17	55.2632		59	16	72.8814
	32	32	0		72	67	6.94444		25	6	76		12	1	91.6667		38	38	0		57	27	52.6316
	23	23	0		68	60	11.7647		23	1	95.6522		5	5	0		34	20	41.1765		57	4	92.9825
	18	18	0		67	66	1.49254		22	2	90.9091		3	2	33.3333		28	16	42.8571		56	3	94.6429
	16	16	0		67	66	1.49254		16	2	87.5		2	2	0		26	13	50		54	23	57.4074
	14	14	0		63	61	3.1746		14	14	0		2	2	0		16	5	68.75		49	9	81.6327
	12	12	0		62	62	0		6	3	50		0	0			13	8	38.4615		48	6	87.5
	2	2	0		61	55	9.83607		5	2	60		0	0			11	3	72.7273		43	2	95.3488
	0	0			59	57	3.38983		0	0			0	0			7	2	71.4286		27	3	88.8889
	0	0			59	44	25.4237		0	0			0	0			3	3	0		20	20	0
	0	0			56	54	3.57143		0	0			0	0			0	0			0	0
					54	54	0
					53	52	1.88679
					49	49	0
					47	44	6.38298
					46	43	6.52174
					36	36	0
					33	31	6.06061
					30	30	0
					26	24	7.69231
					26	25	3.84615
					24	22	8.33333
					16	16	0
					15	15	0
					15	13	13.3333
					8	8	0
					0	0

## Sheet: Fig. 4B
Figure 4B
Samples with fewer than 25 embryos were removed from analysis. Rationale described in methods. 0hr count and 30 hr count as the number of unhatched embryos. Replicate 1 and replicate 2 are seperated by a single empty row.
19HR19	19HR07
	Mother	Father			Mother	Father			Mother	Father			Mother	Father			Mother	Father			Mother	Father			Mother	Father			Mother	Father			Mother	Father			Mother	Father			Mother	Father			Mother	Father			Mother
	nos:VP16[-];ywT3[-]	nos:VP16[-];wMel cifA;cifB[-]			nos:VP16[-];ywT3[-]	nos:VP16[-];wRi cifAT2[-]			nos:VP16[-];ywT3[-]	nos:VP16[-];wRi cifBT2[-]			nos:VP16[-];ywT3[-]	nos:VP16[-];wRi cifAT2;cifBT2[-]			nos:VP16[-];wRi cifAT2[-]	nos:VP16[-];wMel cifA;cifB[-]			nos:VP16[-];wRi cifAT2[-]	nos:VP16[-];wRi cifBT2[-]			nos:VP16[-];wRi cifAT2[-]	nos:VP16[-];wRi cifAT2;cifBT2[-]			nos:VP16[-];wRi cifAT2;cifBT2[-]	nos:VP16[-];wMel cifA;cifB[-]			nos:VP16[-];wRi cifAT2;cifBT2[-]	nos:VP16[-];wRi cifBT2[-]			nos:VP16[-];wRi cifAT2;cifBT2[-]	nos:VP16[-];wRi cifAT2;cifBT2[-]			nos:VP16[-];wMel cifA[-]	nos:VP16[-];wMel cifA;cifB[-]			nos:VP16[-];wMel cifA[-]	nos:VP16[-];wRi cifBT2[-]			nos:VP16[-];wMel cifA[-]
	0 Hr Count	30 Hr Count	% Hatching		0 Hr Count	30 Hr Count	% Hatching		0 Hr Count	30 Hr Count	% Hatching		0 Hr Count	30 Hr Count	% Hatching		0 Hr Count	30 Hr Count	% Hatching		0 Hr Count	30 Hr Count	% Hatching		0 Hr Count	30 Hr Count	% Hatching		0 Hr Count	30 Hr Count	% Hatching		0 Hr Count	30 Hr Count	% Hatching		0 Hr Count	30 Hr Count	% Hatching		0 Hr Count	30 Hr Count	% Hatching		0 Hr Count	30 Hr Count	% Hatching		0 Hr Count
	101	100	0.990099		107	1	99.0654		108	11	89.8148		124	2	98.3871		108	108	0		102	11	89.2157		108	4	96.2963		99	99	0		133	2	98.4962		116	2	98.2759		88	1	98.8636		96	2	97.9167		98
	98	97	1.02041		106	2	98.1132		99	2	97.9798		107	20	81.3084		107	107	0		98	4	95.9184		107	25	76.6355		78	78	0		113	6	94.6903		108	0	100		82	4	95.122		90	5	94.4444		96
	81	80	1.23457		106	4	96.2264		98	6	93.8776		86	8	90.6977		100	100	0		95	0	100		106	0	100		77	77	0		106	9	91.5094		95	6	93.6842		81	2	97.5309		84	0	100		94
	73	71	2.73973		104	10	90.3846		92	3	96.7391		81	17	79.0123		98	96	2.04082		93	1	98.9247		99	1	98.9899		74	74	0		89	7	92.1348		92	4	95.6522		80	1	98.75		78	1	98.7179		92
	72	72	0		93	2	97.8495		82	1	98.7805		70	3	95.7143		96	95	1.04167		91	2	97.8022		98	0	100		70	70	0		89	1	98.8764		81	1	98.7654		78	1	98.7179		77	1	98.7013		88
	70	69	1.42857		86	1	98.8372		79	2	97.4684		67	21	68.6567		95	93	2.10526		90	2	97.7778		97	8	91.7526		59	58	1.69492		71	2	97.1831		77	4	94.8052		71	0	100		68	0	100		82
	68	62	8.82353		84	10	88.0952		67	6	91.0448		66	6	90.9091		95	95	0		90	2	97.7778		94	3	96.8085		58	58	0		69	39	43.4783		76	4	94.7368		71	1	98.5915		66	2	96.9697		76
	66	66	0		82	4	95.122		65	4	93.8462		65	2	96.9231		89	89	0		90	2	97.7778		92	1	98.913		50	49	2		63	0	100		74	20	72.973		69	0	100		61	24	60.6557		72
	66	65	1.51515		80	4	95		63	6	90.4762		63	6	90.4762		89	88	1.1236		88	1	98.8636		84	2	97.619		50	50	0		46	44	4.34783		64	41	35.9375		55	2	96.3636		56	1	98.2143		70
	60	59	1.66667		78	5	93.5897		62	1	98.3871		61	1	98.3607		87	87	0		87	25	71.2644		83	4	95.1807		49	49	0		45	45	0		56	14	75		50	0	100		54	2	96.2963		62
	57	57	0		77	9	88.3117		61	5	91.8033		57	24	57.8947		85	84	1.17647		85	3	96.4706		82	7	91.4634		48	48	0		45	19	57.7778		52	25	51.9231		47	3	93.617		48	1	97.9167		60
	56	56	0		71	3	95.7746		55	3	94.5455		57	1	98.2456		83	83	0		80	2	97.5		79	1	98.7342		45	45	0		42	0	100		42	30	28.5714		44	2	95.4545		47	3	93.617		47
	55	55	0		70	3	95.7143		50	5	90		55	8	85.4545		82	81	1.21951		80	2	97.5		76	5	93.4211		43	41	4.65116		42	42	0		31	19	38.7097		26	0	100		39	0	100		47
	51	51	0		66	4	93.9394		50	4	92		54	2	96.2963		79	77	2.53165		80	1	98.75		75	47	37.3333		37	37	0		20	3	85		0	0			1	1	0		39	2	94.8718		34
	45	45	0		64	1	98.4375		48	2	95.8333		52	8	84.6154		76	76	0		79	5	93.6709		74	6	91.8919		24	24	0		18	1	94.4444		0	0			0	0			33	10	69.697		21
	43	43	0		55	1	98.1818		48	42	12.5		50	3	94		61	61	0		77	4	94.8052		74	5	93.2432		22	22	0		12	2	83.3333		0	0			0	0			0	0			0
	39	38	2.5641		53	1	98.1132		45	12	73.3333		48	19	60.4167		60	60	0		76	2	97.3684		72	25	65.2778
	39	39	0		51	7	86.2745		44	8	81.8182		47	1	97.8723		58	56	3.44828		75	0	100		63	12	80.9524		19	19	0		48	5	89.5833		59	0	100		52	0	100		57	1	98.2456		40
	39	39	0		48	5	89.5833		44	3	93.1818		42	7	83.3333		52	49	5.76923		74	2	97.2973		59	2	96.6102		73	73	0		0	0			0	0			70	1	98.5714		1	0	100		87
	38	38	0		46	14	69.5652		36	36	0		42	0	100		49	48	2.04082		65	34	47.6923		59	1	98.3051		43	41	4.65116		1	1	0		74	4	94.5946		87	1	98.8506		50	2	96		0
	35	35	0		44	3	93.1818		35	2	94.2857		41	39	4.87805		47	47	0		65	1	98.4615		57	2	96.4912		0	0			48	31	35.4167		0	0			55	55	0		11	11	0		42
	29	29	0		43	2	95.3488		32	10	68.75		40	6	85		44	43	2.27273		63	13	79.3651		56	3	94.6429		5	5	0		77	7	90.9091		62	8	87.0968		39	4	89.7436		0	0			113
	28	28	0		40	8	80		32	5	84.375		40	1	97.5		42	41	2.38095		60	5	91.6667		54	1	98.1481		64	64	0		55	9	83.6364		62	7	88.7097		26	1	96.1538		100	0	100		0
	28	28	0		29	3	89.6552		26	15	42.3077		39	4	89.7436		42	42	0		57	1	98.2456		53	18	66.0377		35	35	0		64	10	84.375		63	2	96.8254		59	1	98.3051		27	5	81.4815		42
	28	28	0		24	7	70.8333		21	0	100		38	8	78.9474		42	41	2.38095		57	1	98.2456		38	11	71.0526		69	69	0		49	22	55.102		45	6	86.6667		65	11	83.0769		53	4	92.4528		82
	22	22	0		19	4	78.9474		12	12	0		33	25	24.2424		19	19	0		55	8	85.4545		8	8	0		150	149	0.666667		40	5	87.5		63	19	69.8413		48	21	56.25		0	0			22
	12	12	0		12	12	0		1	0	100		31	5	83.871		9	9	0		55	1	98.1818		6	0	100		0	0			0	0			0	0			30	5	83.3333		71	18	74.6479		59
	0	0			10	2	80		0	0			21	21	0		6	6	0		44	11	75		0	0			86	86	0		0	0			40	1	97.5		0	0			79	4	94.9367		0
	0	0			8	7	12.5		0	0			11	11	0		5	5	0		35	3	91.4286		0	0			35	35	0		30	2	93.3333		101	3	97.0297		0	0			49	1	97.9592		71
	0	0			0	0			0	0			2	1	50		0	0			10	5	50		0	0			11	11	0		77	1	98.7013		80	11	86.25		0	0			59	3	94.9153		57
	0	0			0	0			0	0			0	0			0	0			0	0			0	0			54	54	0		0	0			45	1	97.7778		58	37	36.2069		47	3	93.617		58
	0	0			0	0			0	0			0	0			0	0			0	0			0	0			50	50	0		18	0	100		63	2	96.8254		3	3	0		30	6	80		69
																													54	52	3.7037		69	5	92.7536		49	38	22.449		79	2	97.4684		19	2	89.4737		72
	15	15	0		38	5	86.8421		54	9	83.3333		41	2	95.122		92	92	0		37	14	62.1622		89	1	98.8764		52	51	1.92308		2	2	0		25	25	0		88	0	100		22	1	95.4545		57
	46	45	2.17391		25	25	0		57	5	91.2281		108	45	58.3333		2	2	0		69	20	71.0145		78	0	100		0	0			112	20	82.1429		0	0			70	4	94.2857		47	5	89.3617		81
	62	62	0		0	0			64	8	87.5		18	7	61.1111		61	61	0		22	2	90.9091		70	2	97.1429		0	0			42	21	50		11	11	0		38	6	84.2105		0	0			38
	56	56	0		33	11	66.6667		41	7	82.9268		0	0			56	56	0		73	1	98.6301		82	2	97.561		22	22	0		59	7	88.1356		78	31	60.2564		63	7	88.8889		65	11	83.0769		62
	44	44	0		32	2	93.75		2	0	100		82	13	84.1463		79	79	0		74	9	87.8378		78	14	82.0513		45	45	0		60	4	93.3333		67	2	97.0149		97	24	75.2577		20	20	0		8
	21	21	0		40	8	80		0	0			0	0			26	26	0		65	1	98.4615		91	5	94.5055		99	99	0		60	4	93.3333		0	0			31	2	93.5484		54	3	94.4444		43
	40	35	12.5		26	2	92.3077		10	9	10		58	6	89.6552		69	69	0		107	1	99.0654		67	7	89.5522		1	1	0		74	9	87.8378		37	5	86.4865		77	3	96.1039		85	2	97.6471		55
	59	59	0		0	0			37	6	83.7838		38	10	73.6842		0	0			43	1	97.6744		71	0	100		28	28	0		79	16	79.7468		80	24	70		6	6	0		52	4	92.3077		0
	7	7	0		0	0			21	3	85.7143		56	26	53.5714		21	21	0		33	4	87.8788		83	2	97.5904		95	44	53.6842		0	0			68	10	85.2941		7	7	0		44	0	100		65
	100	100	0		0	0			49	3	93.8776		9	9	0		44	44	0		11	11	0		27	2	92.5926		42	42	0		77	3	96.1039		74	2	97.2973		45	1	97.7778		16	0	100		62
	0	0			48	0	100		27	2	92.5926		32	7	78.125		119	117	1.68067		7	3	57.1429		5	5	0		16	16	0		63	23	63.4921		13	13	0		85	0	100		63	2	96.8254		79
	52	52	0		6	6	0		41	11	73.1707		43	4	90.6977		69	69	0		31	8	74.1935		70	2	97.1429		70	70	0		9	9	0		62	17	72.5806		101	1	99.0099		89	1	98.8764		50
	69	69	0		30	2	93.3333		18	7	61.1111		45	10	77.7778		60	60	0		55	12	78.1818		0	0			48	48	0		58	3	94.8276		0	0			58	5	91.3793		0	0			45
	62	62	0		77	2	97.4026		8	8	0		57	27	52.6316		51	49	3.92157		78	1	98.7179		0	0			27	27	0		0	0			28	8	71.4286		93	25	73.1183		60	5	91.6667		70
	40	40	0		41	17	58.5366		54	3	94.4444		0	0			34	34	0		75	2	97.3333		0	0			91	91	0		129	9	93.0233		68	14	79.4118		64	2	96.875		93	5	94.6237		110
	15	15	0		33	29	12.1212		8	8	0		67	7	89.5522		80	80	0		103	0	100		50	0	100		82	82	0		51	4	92.1569		12	12	0		0	0			79	2	97.4684		42
	10	10	0		85	2	97.6471		45	2	95.5556		62	11	82.2581		83	81	2.40964		53	1	98.1132		50	2	96
	25	25	0		50	2	96		66	1	98.4848		87	17	80.4598		96	95	1.04167		79	3	96.2025		90	3	96.6667
	46	44	4.34783		60	6	90		43	3	93.0233		101	7	93.0693		72	72	0		71	9	87.3239		120	5	95.8333
	47	47	0		15	15	0		24	0	100		0	0			40	30	25		70	0	100		57	2	96.4912
	29	29	0		5	4	20		2	2	0		33	7	78.7879		38	38	0		40	39	2.5		92	4	95.6522
	0	0			24	8	66.6667		25	6	76		60	6	90		61	61	0		47	2	95.7447		94	7	92.5532
	56	55	1.78571		1	1	0		35	6	82.8571		9	9	0		108	108	0		17	16	5.88235		80	1	98.75
	98	97	1.02041		31	3	90.3226		82	4	95.122		12	2	83.3333		38	38	0		16	16	0		71	2	97.1831
	120	120	0		99	9	90.9091		13	11	15.3846		71	13	81.6901		73	73	0		87	2	97.7011		75	2	97.3333
	11	11	0		80	4	95		19	2	89.4737		0	0			76	75	1.31579		55	3	94.5455		104	1	99.0385
	90	89	1.11111		74	12	83.7838		66	8	87.8788		44	8	81.8182		104	104	0		97	2	97.9381		0	0
	71	69	2.8169		94	22	76.5957		76	22	71.0526		68	26	61.7647		71	71	0		2	2	0		73	1	98.6301
	38	38	0		43	6	86.0465		80	4	95		53	7	86.7925		47	47	0		116	1	99.1379		68	12	82.3529
	26	25	3.84615		85	7	91.7647		37	4	89.1892		53	10	81.1321		41	41	0		48	6	87.5		69	9	86.9565
	34	34	0		27	5	81.4815		52	8	84.6154		102	0	100		59	58	1.69492		68	3	95.5882		65	21	67.6923
	31	31	0						56	5	91.0714		49	21	57.1429		109	109	0		45	6	86.6667		73	4	94.5205
[truncated: 2 more columns]

## Sheet: Fig. 4C
Figure 4C
Samples with fewer than 25 embryos were removed from analysis. Rationale described in methods. 0hr count and 30 hr count as the number of unhatched embryos. Replicate 1 and replicate 2 are seperated by a single empty row.
19HR30	19HR18
	Mother	Father			Mother	Father			Mother	Father			Mother	Father			Mother	Father			Mother	Father
	nos:VP16[-];ywT3[-]	nos:VP16[-];wMel cifA;cifB[-]			nos:VP16[-];ywT3[-]	nos:VP16[-];wMel cifA; wRi cifB[T2][-]			nos:VP16[-];wRi cifA[T2][-]	nos:VP16[-];wMel cifA;cifB[-]			nos:VP16[-];wRi cifA[T2][-]	nos:VP16[-];wMel cifA; wRi cifB[T2][-]			nos:VP16[-];wMel cifA[-]	nos:VP16[-];wMel cifA;cifB[-]			nos:VP16[-];wMel cifA[-]	nos:VP16[-];wMel cifA; wRi cifB[T2][-]
	0 Hr Count	30 Hr Count	% Hatching		0 Hr Count	30 Hr Count	% Hatching		0 Hr Count	30 Hr Count	% Hatching		0 Hr Count	30 Hr Count	% Hatching		0 Hr Count	30 Hr Count	% Hatching		0 Hr Count	30 Hr Count	% Hatching
	142	141	0.704225		106	22	79.2453		111	110	0.900901		121	0	100		111	8	92.7928		109	1	99.0826
	108	107	0.925926		97	1	98.9691		108	107	0.925926		105	3	97.1429		108	2	98.1481		109	10	90.8257
	99	97	2.0202		96	2	97.9167		105	104	0.952381		103	16	84.466		107	1	99.0654		100	5	95
	97	95	2.06186		91	2	97.8022		103	102	0.970874		98	6	93.8776		88	1	98.8636		93	5	94.6237
	93	92	1.07527		89	6	93.2584		102	102	0		90	5	94.4444		87	3	96.5517		88	5	94.3182
	77	76	1.2987		87	15	82.7586		97	96	1.03093		90	2	97.7778		87	1	98.8506		66	0	100
	58	58	0		85	1	98.8235		89	88	1.1236		84	2	97.619		82	2	97.561		64	4	93.75
	54	54	0		85	6	92.9412		78	78	0		84	0	100		65	16	75.3846		62	6	90.3226
	53	53	0		84	3	96.4286		74	74	0		73	0	100		62	32	48.3871		51	2	96.0784
	50	50	0		82	12	85.3659		70	70	0		67	1	98.5075		61	6	90.1639		49	4	91.8367
	47	46	2.12766		77	17	77.9221		50	49	2		67	12	82.0896		31	1	96.7742		46	2	95.6522
	45	44	2.22222		77	6	92.2078		20	20	0		63	11	82.5397		27	11	59.2593		46	12	73.913
	44	44	0		75	0	100		7	7	0		58	6	89.6552		21	21	0		43	7	83.7209
	41	41	0		73	18	75.3425		3	3	0		39	39	0		10	10	0		40	40	0
	33	33	0		73	6	91.7808		0	0			9	9	0		0	0			28	1	96.4286
	31	31	0		69	8	88.4058		0	0			0	0			0	0			0	0
	29	29	0		64	24	62.5
	29	29	0		52	7	86.5385		70	70	0		48	1	97.9167		52	5	90.3846		107	13	87.8505
	29	29	0		51	12	76.4706		81	80	1.23457		108	6	94.4444		59	0	100		35	1	97.1429
	29	29	0		46	1	97.8261		0	0			75	1	98.6667		91	2	97.8022		41	0	100
	25	24	4		34	3	91.1765		84	82	2.38095		57	2	96.4912		47	7	85.1064		10	0	100
	20	20	0		33	7	78.7879		92	90	2.17391		83	1	98.7952		126	1	99.2063		18	1	94.4444
	18	18	0		32	32	0		83	82	1.20482		97	2	97.9381		91	4	95.6044		39	0	100
	15	15	0		32	1	96.875		104	102	1.92308		95	2	97.8947		126	2	98.4127		110	4	96.3636
	11	11	0		31	4	87.0968		107	107	0		78	1	98.7179		117	0	100		108	22	79.6296
	8	8	0		29	29	0		61	61	0		83	1	98.7952		56	0	100		97	3	96.9072
	8	8	0		27	11	59.2593		108	107	0.925926		91	0	100		113	107	5.30973		15	15	0
	5	5	0		13	4	69.2308		96	95	1.04167		102	0	100		81	7	91.358		10	10	0
	0	0			10	7	30		72	72	0		72	3	95.8333		54	0	100		89	2	97.7528
	0	0			0	0			95	94	1.05263		102	3	97.0588		79	2	97.4684		56	2	96.4286
	0	0			0	0			84	84	0		0	0			115	4	96.5217		63	2	96.8254
	0	0			0	0			64	64	0		109	3	97.2477		108	0	100		0	0
									98	97	1.02041		88	2	97.7273		84	1	98.8095		84	7	91.6667
	48	47	2.08333		51	5	90.1961		83	82	1.20482		5	5	0		60	1	98.3333		76	4	94.7368
	44	44	0		74	3	95.9459		102	101	0.980392		76	4	94.7368		58	1	98.2759		0	0
	33	33	0		44	5	88.6364		98	97	1.02041		99	2	97.9798		100	3	97		42	15	64.2857
	37	37	0		49	4	91.8367		11	11	0		62	9	85.4839		80	3	96.25		67	2	97.0149
	4	4	0		1	1	0		64	64	0		73	5	93.1507		77	2	97.4026		35	1	97.1429
	50	47	6		73	6	91.7808		65	65	0		85	6	92.9412		67	0	100		94	1	98.9362
	9	9	0		30	30	0		100	98	2		29	25	13.7931		77	0	100		76	3	96.0526
	9	9	0		104	19	81.7308		104	104	0		53	17	67.9245		74	3	95.9459		65	7	89.2308
	106	106	0		95	9	90.5263		97	96	1.03093		0	0			108	4	96.2963		60	4	93.3333
	16	16	0		94	3	96.8085		84	84	0		95	3	96.8421		99	2	97.9798		0	0
	13	13	0		43	1	97.6744		77	77	0		75	8	89.3333		23	0	100		0	0
	62	62	0		50	1	98		106	106	0		26	25	3.84615		48	1	97.9167		72	1	98.6111
	0	0			61	11	81.9672		92	92	0		81	6	92.5926		71	1	98.5915		84	7	91.6667
	80	80	0		48	8	83.3333		52	52	0		90	10	88.8889		37	14	62.1622		68	1	98.5294
	52	51	1.92308		82	6	92.6829		88	88	0		22	8	63.6364		102	0	100		38	10	73.6842
	34	34	0		73	2	97.2603		90	89	1.11111		88	4	95.4545		91	1	98.9011		65	13	80
	101	101	0		104	3	97.1154
	61	60	1.63934		87	1	98.8506
	83	83	0		82	2	97.561
	36	35	2.77778		83	6	92.7711
	12	12	0		80	6	92.5
	84	84	0		67	26	61.194
	40	40	0		54	4	92.5926
	29	29	0		72	4	94.4444
	93	92	1.07527		77	3	96.1039
	36	36	0		96	5	94.7917
	10	10	0		58	1	98.2759
	59	59	0		56	11	80.3571
	96	95	1.04167		0	0
	0	0			0	0
	56	56	0		72	1	98.6111
	106	104	1.88679		90	8	91.1111

## Sheet: Fig. 4D
Figure 4D
Samples with fewer than 25 embryos were removed from analysis. Rationale described in methods. 0hr count and 30 hr count as the number of unhatched embryos. Replicate 1 and replicate 2 are seperated by a single empty row.
19HR29	19HR21
	Mother	Father			Mother	Father			Mother	Father			Mother	Father			Mother	Father			Mother	Father
	nos:VP16[-];ywT3[-]	nos:VP16[-];wMel cifA;cifB[-]			nos:VP16[-];ywT3[-]	nos:VP16[-];wRi cifA[T2]; wMel cifB[-]			nos:VP16[-];wRi cifA[T2][-]	nos:VP16[-];wMel cifA;cifB[-]			nos:VP16[-];wRi cifA[T2][-]	nos:VP16[-];wRi cifA[T2]; wMel cifB[-]			nos:VP16[-];wMel cifA[-]	nos:VP16[-];wMel cifA;cifB[-]			nos:VP16[-];wMel cifA[-]	nos:VP16[-];wRi cifA[T2]; wMel cifB[5'][-]
	0 Hr Count	30 Hr Count	% Hatching		0 Hr Count	30 Hr Count	% Hatching		0 Hr Count	30 Hr Count	% Hatching		0 Hr Count	30 Hr Count	% Hatching		0 Hr Count	30 Hr Count	% Hatching		0 Hr Count	30 Hr Count	% Hatching
	0	0			120	15	87.5		83	83	0		0	0			93	0	100		61	6	90.1639
	6	6	0		0	0			81	80	1.23457		0	0			67	2	97.0149		74	1	98.6486
	93	92	1.07527		49	3	93.8776		63	63	0		69	2	97.1014		100	2	98		87	2	97.7011
	0	0			99	10	89.899		99	97	2.0202		71	5	92.9577		97	1	98.9691		89	4	95.5056
	124	124	0		70	17	75.7143		0	0			94	25	73.4043		80	3	96.25		57	2	96.4912
	100	98	2		99	5	94.9495		49	49	0		66	4	93.9394		0	0			0	0
	53	53	0		105	2	98.0952		70	70	0		77	3	96.1039		40	29	27.5		74	2	97.2973
	102	102	0		71	71	0		49	49	0		120	9	92.5		55	2	96.3636		97	14	85.567
	0	0			0	0			117	117	0		0	0			98	4	95.9184		84	1	98.8095
	39	39	0		8	4	50		70	70	0		28	1	96.4286		108	1	99.0741		2	2	0
	88	88	0		67	21	68.6567		118	118	0		74	6	91.8919		102	25	75.4902		67	1	98.5075
	83	83	0		0	0			85	84	1.17647		124	20	83.871		114	2	98.2456		89	2	97.7528
	106	105	0.943396		58	13	77.5862		90	90	0		54	4	92.5926		50	3	94		77	26	66.2338
	0	0			91	2	97.8022		0	0			74	3	95.9459		23	1	95.6522		137	2	98.5401
	96	96	0		89	1	98.8764		75	75	0		90	10	88.8889		10	10	0		101	0	100
	80	79	1.25		125	7	94.4		80	80	0		0	0			65	1	98.4615		111	6	94.5946
	81	79	2.46914		41	6	85.3659
	102	102	0		0	0			142	141	0.704225		121	3	97.5207		134	0	100		118	2	98.3051
	93	93	0		140	13	90.7143		137	136	0.729927		112	35	68.75		123	6	95.122		117	1	99.1453
	94	94	0		41	41	0		133	133	0		111	6	94.5946		122	2	98.3607		117	0	100
	75	74	1.33333		88	2	97.7273		127	127	0		110	4	96.3636		122	3	97.541		106	0	100
	0	0			75	1	98.6667		123	122	0.813008		105	9	91.4286		120	0	100		103	4	96.1165
	110	110	0		74	31	58.1081		117	116	0.854701		101	2	98.0198		120	1	99.1667		102	3	97.0588
	75	75	0		87	7	91.954		117	117	0		101	1	99.0099		118	2	98.3051		100	1	99
	93	93	0		93	7	92.4731		115	115	0		90	1	98.8889		117	7	94.0171		100	6	94
	85	85	0		73	4	94.5205		113	113	0		87	17	80.4598		116	0	100		99	1	98.9899
	89	89	0		98	2	97.9592		111	111	0		86	4	95.3488		113	4	96.4602		99	2	97.9798
	96	96	0		108	42	61.1111		110	110	0		85	4	95.2941		112	2	98.2143		98	3	96.9388
	47	47	0		89	41	53.9326		99	99	0		84	18	78.5714		107	7	93.4579		97	1	98.9691
	64	64	0		0	0			97	97	0		84	11	86.9048		100	2	98		96	1	98.9583
	85	84	1.17647		0	0			94	93	1.06383		83	1	98.7952		98	9	90.8163		89	1	98.8764
	69	69	0		73	2	97.2603		89	87	2.24719		82	2	97.561		98	1	98.9796		88	3	96.5909
									87	86	1.14943		81	1	98.7654		96	3	96.875		88	2	97.7273
	126	125	0.793651		127	5	96.063		76	75	1.31579		80	1	98.75		87	1	98.8506		83	0	100
	105	104	0.952381		123	1	99.187		19	19	0		79	79	0		87	2	97.7011		81	1	98.7654
	101	101	0		106	4	96.2264		1	1	0		78	4	94.8718		85	8	90.5882		79	1	98.7342
	95	95	0		104	23	77.8846		0	0			76	3	96.0526		84	3	96.4286		75	0	100
	94	93	1.06383		102	1	99.0196		0	0			76	1	98.6842		79	1	98.7342		74	1	98.6486
	93	93	0		100	2	98		0	0			74	0	100		77	2	97.4026		74	1	98.6486
	87	87	0		100	2	98						55	1	98.1818		76	13	82.8947		74	3	95.9459
	82	82	0		100	2	98						47	0	100		76	1	98.6842		72	2	97.2222
	56	56	0		98	3	96.9388						16	1	93.75		56	3	94.6429		69	1	98.5507
	54	54	0		96	0	100						1	0	100		54	1	98.1481		63	3	95.2381
	0	0			96	35	63.5417						0	0			52	1	98.0769		58	17	70.6897
	0	0			93	5	94.6237						0	0			45	7	84.4444		55	2	96.3636
					79	4	94.9367						0	0			27	6	77.7778		40	2	95
					78	78	0						0	0			19	18	5.26316		37	15	59.4595
					77	5	93.5065						0	0			0	0			7	7	0
					76	11	85.5263						0	0			0	0			0	0
					75	0	100
					70	14	80
					59	6	89.8305
					59	5	91.5254
					21	7	66.6667
					8	4	50
					0	0
					0	0

## Sheet: Fig. S1
Figure S1
Samples with fewer than 25 embryos were removed from analysis. Rationale described in methods. 0hr count and 30 hr count as the number of unhatched embryos.
18HR20
	Mother	Father			Mother	Father			Mother	Father			Mother	Father			Mother	Father			Mother	Father			Mother	Father			Mother	Father			Mother	Father			Mother	Father
	nos:VP16[-]ywT3[-]	nos:VP16[-];cifAmel[-];cifBmel[-]			nos:VP16[-]ywT3[-]	nos:VP16[-];cifArec[-]			nos:VP16[-]ywT3[-]	nos:VP16[-];cifBrec[-]			nos:VP16[-]ywT3[-]	nos:VP16[-];cifArec[-];cifBrec[-]			nos:VP16[-];cifArec	nos:VP16[-];cifAmel[-];cifBmel[-]			nos:VP16[-];cifArec	nos:VP16[-];cifBrec[-]			nos:VP16[-];cifArec	nos:VP16[-];cifArec[-];cifBrec[-]			yw[+];ywT3[-]	nos:VP16[-];cifAmel[-];cifBmel[-]			yw[+];ywT3[-]	nos:VP16[-];cifBrec[-]			yw[+];ywT3[-]	nos:VP16[-];cifArec[-];cifBrec[-]
	0 Hr Count	30 Hr Count	% Hatching		0 Hr Count	30 Hr Count	% Hatching		0 Hr Count	30 Hr Count	% Hatching		0 Hr Count	30 Hr Count	% Hatching		0 Hr Count	30 Hr Count	% Hatching		0 Hr Count	30 Hr Count	% Hatching		0 Hr Count	30 Hr Count	% Hatching		0 Hr Count	30 Hr Count	% Hatching		0 Hr Count	30 Hr Count	% Hatching		0 Hr Count	30 Hr Count	% Hatching
	8	8	0		65	1	98.4615		29	29	0		66	2	96.9697		109	11	89.9083		61	61	0		87	2	97.7011		70	0	100		34	34	0		32	6	81.25
	75	74	1.33333		75	2	97.3333		50	50	0		24	17	29.1667		83	1	98.7952		41	41	0		1	0	100		42	0	100		13	13	0		17	7	58.8235
	66	65	1.51515		50	48	4		49	49	0		56	46	17.8571		99	4	95.9596		68	68	0		6	2	66.6667		31	0	100		30	30	0		63	9	85.7143
	64	64	0		69	1	98.5507		58	58	0		89	15	83.1461		104	2	98.0769		56	56	0		69	3	95.6522		21	21	0		13	13	0		25	21	16
	29	29	0		43	0	100		79	79	0		98	4	95.9184		24	0	100		85	85	0		75	2	97.3333		32	4	87.5		8	8	0		88	4	95.4545
	16	16	0		84	1	98.8095		122	122	0		31	10	67.7419		34	13	61.7647		71	71	0		97	6	93.8144		23	10	56.5217		1	1	0		27	26	3.7037
	94	94	0		82	0	100		9	9	0		84	12	85.7143		110	2	98.1818		8	8	0		12	1	91.6667		21	21	0		28	28	0		17	10	41.1765
	75	74	1.33333		74	2	97.2973		76	76	0		65	16	75.3846		79	2	97.4684		33	33	0		74	2	97.2973		34	30	11.7647		20	20	0		0	0
	104	104	0		26	4	84.6154		45	45	0		100	7	93		0	0			0	0			57	32	43.8596		14	0	100		13	13	0		7	7	0
	79	79	0		4	3	25		85	85	0		1	1	0		92	1	98.913		32	32	0		80	3	96.25		22	22	0		5	5	0		24	24	0
	90	87	3.33333		5	5	0		0	0			5	5	0		6	0	100		0	0			86	1	98.8372		52	1	98.0769		0	0			20	17	15
	74	74	0		0	0			14	14	0		89	5	94.382		118	3	97.4576		52	52	0		9	9	0		26	21	19.2308		39	39	0		23	20	13.0435
	55	55	0		83	1	98.7952		65	65	0		72	17	76.3889		15	4	73.3333		29	29	0		85	7	91.7647		65	0	100		0	0			29	17	41.3793
	82	82	0		47	9	80.8511		57	57	0		87	15	82.7586		73	2	97.2603		2	2	0		12	12	0		11	11	0		53	53	0		60	5	91.6667
	73	71	2.73973		1	1	0		37	37	0		92	21	77.1739		89	1	98.8764		15	15	0		58	0	100		12	12	0		17	17	0		63	4	93.6508
	90	90	0		87	0	100		25	25	0		86	6	93.0233		97	2	97.9381		85	85	0		110	3	97.2727		0	0			68	68	0		54	3	94.4444
					70	4	94.2857		67	67	0		0	0			96	5	94.7917		74	74	0		70	2	97.1429		19	13	31.5789		14	14	0		41	3	92.6829
					41	10	75.6098		85	85	0		40	7	82.5		3	3	0		17	17	0		120	3	97.5		64	5	92.1875		12	12	0		80	10	87.5
					85	2	97.6471		72	72	0		100	11	89		0	0			0	0			102	2	98.0392		32	3	90.625		36	36	0		77	4	94.8052
					78	4	94.8718		60	60	0		89	14	84.2697		28	1	96.4286		49	49	0		84	11	86.9048		34	12	64.7059		15	15	0		10	7	30
					82	11	86.5854		26	26	0		52	19	63.4615		66	34	48.4848		54	54	0		78	3	96.1538		15	1	93.3333		10	10	0		31	31	0
					55	40	27.2727		43	43	0		83	38	54.2169		96	4	95.8333		31	31	0		70	5	92.8571		62	2	96.7742		4	4	0		0	0
									6	6	0		119	3	97.479		106	2	98.1132		12	12	0		40	4	90		12	12	0		13	13	0		5	5	0
									12	12	0		111	30	72.973		91	2	97.8022		49	49	0		36	5	86.1111		65	1	98.4615		17	17	0		61	2	96.7213
									48	48	0		103	9	91.2621		70	34	51.4286		52	52	0		0	0			11	11	0		0	0			7	5	28.5714
													84	20	76.1905		85	1	98.8235		85	85	0		100	1	99		26	2	92.3077		0	0			33	7	78.7879
													127	15	88.189		151	6	96.0265		0	0			48	1	97.9167		25	12	52		0	0			12	10	16.6667
													86	28	67.4419		88	3	96.5909		48	48	0		83	1	98.7952		11	9	18.1818		11	11	0		25	23	8
													33	6	81.8182		93	2	97.8495						65	7	89.2308		16	3	81.25		25	25	0		20	4	80
													0	0			49	1	97.9592						53	8	84.9057		22	4	81.8182						47	1	97.8723
													88	19	78.4091		97	2	97.9381						61	1	98.3607		2	2	0						33	4	87.8788
													22	15	31.8182		101	9	91.0891						90	1	98.8889										7	1	85.7143
																									127	12	90.5512										5	2	60
																									95	8	91.5789										39	5	87.1795
																									108	1	99.0741										34	7	79.4118
																									75	2	97.3333										7	2	71.4286
																									111	3	97.2973										14	14	0
																									57	24	57.8947										24	4	83.3333
																									10	6	40										35	6	82.8571
																									82	10	87.8049										43	40	6.97674
																									92	4	95.6522										61	3	95.082
																									61	1	98.3607										6	1	83.3333
																									43	19	55.814										47	4	91.4894
																									60	4	93.3333										2	2	0
																									67	0	100										2	1	50
																									94	0	100										0	0
																									81	28	65.4321										0	0
																									53	14	73.5849										37	13	64.8649

[truncated: 5 more sheets: Fig. S2, Fig. S3A, Fig. S3B, Fig. S4A, Fig. S4B]
